# Supplementary material for: Influence of the chloride concentration on ligand substitution reactions of [Pt(SMC)Cl2] with biologically relevant nucleophiles
Source: Royal Society of Chemistry journal article supplement (doi:10.1039/b822718g), 2009-01-01
Supplement: b822718g.pdf [file b822718g.pdf]

Electronic Supplementary Information for Dalton Transactions  
This journal is © The Royal Society of Chemistry 2009

## **Supplementary Information**

### **Influence of the chloride concentration on ligand substitution reactions of [Pt(SMC)Cl<sub>2</sub>] with biologically relevant nucleophiles**

Tanja Soldatović, Živadin D. Bugarčić and Rudi van Eldik\*

**Table S1.** Summary of the selected wavelengths (nm) used in the kinetic measurements.

| Nucleophile | pH  | reaction step | Wavelength, nm |
|-------------|-----|---------------|----------------|
| L-met       | 2.5 | 1             | 260            |
|             | 7.2 |               |                |
| GSH         | 2.5 | 1             | 252            |
| INO         | 2.5 | 1             | 312            |
| 5'-GMP      | 2.5 | 1             | 300            |
|             | 7.2 |               |                |

**Table S2.** Observed pseudo-first-order rate constants as a function of nucleophile concentration for the reaction of [Pt(SMC)Cl<sub>2</sub>] with L-methionine in the presence of various chloride concentrations. I = 0.10 M NaClO<sub>4</sub> at pH = 2.5 and 37 °C.

| C/M   | k <sub>obsd</sub> /s <sup>-1</sup> | k <sub>obsd</sub> /s <sup>-1</sup><br>1.25 mM<br>NaCl | k <sub>obsd</sub> /s <sup>-1</sup><br>2.50 mM<br>NaCl | k <sub>obsd</sub> /s <sup>-1</sup><br>5 mM<br>NaCl | k <sub>obsd</sub> /s <sup>-1</sup><br>10 mM<br>NaCl | k <sub>obsd</sub> /s <sup>-1</sup><br>30 mM<br>NaCl | k <sub>obsd</sub> /s <sup>-1</sup><br>50 mM<br>NaCl |
|-------|------------------------------------|-------------------------------------------------------|-------------------------------------------------------|----------------------------------------------------|-----------------------------------------------------|-----------------------------------------------------|-----------------------------------------------------|
| 0.003 | 0.0879                             | 0.1591                                                | 0.1316                                                | 0.1230                                             | 0.1125                                              | 0.1499                                              | 0.1359                                              |
| 0.006 | 0.1886                             | 0.1974                                                | 0.1720                                                | 0.1402                                             | 0.1267                                              | 0.1695                                              | 0.1403                                              |
| 0.009 | 0.2998                             | 0.2739                                                | 0.1946                                                | 0.1598                                             | 0.1499                                              | 0.1803                                              | 0.1546                                              |
| 0.012 | 0.3717                             | 0.3537                                                | 0.2421                                                | 0.1984                                             | 0.1669                                              | 0.1988                                              | 0.1606                                              |
| 0.015 | 0.4484                             | 0.4028                                                | 0.2822                                                | 0.2184                                             | 0.1783                                              | 0.2181                                              | 0.1754                                              |

**Table S3.** Observed pseudo-first-order rate constants as a function of nucleophile concentration for the reaction of [Pt(SMC)Cl<sub>2</sub>] with L-methionine in the presence of various chloride concentrations. I = 0.25 M Hepes buffer at pH = 7.2 and 37 °C.

| C/M   | $k_{\text{obsd}}/\text{s}^{-1}$ | $k_{\text{obsd}}/\text{s}^{-1}$<br>1.25 mM<br>NaCl | $k_{\text{obsd}}/\text{s}^{-1}$<br>2.50 mM<br>NaCl | $k_{\text{obsd}}/\text{s}^{-1}$<br>5 mM<br>NaCl | $k_{\text{obsd}}/\text{s}^{-1}$<br>10 mM<br>NaCl | $k_{\text{obsd}}/\text{s}^{-1}$<br>30 mM<br>NaCl | $k_{\text{obsd}}/\text{s}^{-1}$<br>50 mM<br>NaCl |
|-------|---------------------------------|----------------------------------------------------|----------------------------------------------------|-------------------------------------------------|--------------------------------------------------|--------------------------------------------------|--------------------------------------------------|
| 0.003 | 0.1186                          | 0.1355                                             | 0.1439                                             | 0.1438                                          | 0.1411                                           | 0.1434                                           | 0.1442                                           |
| 0.006 | 0.2400                          | 0.2177                                             | 0.1836                                             | 0.1789                                          | 0.1551                                           | 0.1530                                           | 0.1517                                           |
| 0.009 | 0.3690                          | 0.2992                                             | 0.2452                                             | 0.1972                                          | 0.1865                                           | 0.1789                                           | 0.1643                                           |
| 0.012 | 0.4592                          | 0.4369                                             | 0.3003                                             | 0.2495                                          | 0.2222                                           | 0.1960                                           | 0.1808                                           |
| 0.015 | 0.6012                          | 0.5294                                             | 0.3779                                             | 0.2844                                          | 0.2439                                           | 0.2063                                           | 0.1987                                           |

**Table S4.** Observed pseudo-first-order rate constants as a function of nucleophile concentration for the reaction of [Pt(SMC)Cl<sub>2</sub>] with glutathione in the presence of various chloride concentrations. I = 0.10 M NaClO<sub>4</sub> at pH = 2.5 and 37 °C.

| C/M   | $k_{\text{obsd}}/\text{s}^{-1}$ | $k_{\text{obsd}}/\text{s}^{-1}$<br>1.25 mM<br>NaCl | $k_{\text{obsd}}/\text{s}^{-1}$<br>2.50 mM<br>NaCl | $k_{\text{obsd}}/\text{s}^{-1}$<br>5 mM<br>NaCl | $k_{\text{obsd}}/\text{s}^{-1}$<br>10 mM<br>NaCl | $k_{\text{obsd}}/\text{s}^{-1}$<br>30 mM<br>NaCl | $k_{\text{obsd}}/\text{s}^{-1}$<br>50 mM<br>NaCl |
|-------|---------------------------------|----------------------------------------------------|----------------------------------------------------|-------------------------------------------------|--------------------------------------------------|--------------------------------------------------|--------------------------------------------------|
| 0.003 | 0.0258                          | 0.0435                                             | 0.0399                                             | 0.0359                                          | 0.0362                                           | 0.0352                                           | 0.0380                                           |
| 0.006 | 0.0418                          | 0.0514                                             | 0.0455                                             | 0.0381                                          | 0.0373                                           | 0.0387                                           | 0.0385                                           |
| 0.009 | 0.0767                          | 0.0654                                             | 0.0527                                             | 0.0421                                          | 0.0414                                           | 0.0407                                           | 0.0407                                           |
| 0.012 | 0.0901                          | 0.0780                                             | 0.0589                                             | 0.0455                                          | 0.0420                                           | 0.0429                                           | 0.0420                                           |
| 0.015 | 0.1204                          | 0.0899                                             | 0.0694                                             | 0.0491                                          | 0.0481                                           | 0.0430                                           | 0.0464                                           |

**Table S5.** Observed pseudo-first-order rate constants as a function of nucleophile concentration for the reaction of [Pt(SMC)Cl<sub>2</sub>] with inosine in the presence of various chloride concentrations. I = 0.10 M NaClO<sub>4</sub> at pH = 2.5 and 37 °C.

| C/M   | k <sub>obsd</sub> /s <sup>-1</sup> | k <sub>obsd</sub> /s <sup>-1</sup><br>1.25 mM<br>NaCl | k <sub>obsd</sub> /s <sup>-1</sup><br>2.50 mM<br>NaCl | k <sub>obsd</sub> /s <sup>-1</sup><br>5 mM<br>NaCl | k <sub>obsd</sub> /s <sup>-1</sup><br>10 mM<br>NaCl | k <sub>obsd</sub> /s <sup>-1</sup><br>30 mM<br>NaCl | k <sub>obsd</sub> /s <sup>-1</sup><br>50 mM<br>NaCl |
|-------|------------------------------------|-------------------------------------------------------|-------------------------------------------------------|----------------------------------------------------|-----------------------------------------------------|-----------------------------------------------------|-----------------------------------------------------|
| 0.003 | 0.0313                             | 0.0347                                                | 0.0265                                                | 0.0320                                             | 0.0274                                              | 0.0302                                              | 0.0300                                              |
| 0.006 | 0.0453                             | 0.0429                                                | 0.0371                                                | 0.0370                                             | 0.0297                                              | 0.0306                                              | 0.0301                                              |
| 0.009 | 0.0584                             | 0.0562                                                | 0.0447                                                | 0.0403                                             | 0.0335                                              | 0.0308                                              | 0.0304                                              |
| 0.012 | 0.0823                             | 0.0738                                                | 0.0597                                                | 0.0460                                             | 0.0350                                              | 0.0310                                              | 0.0305                                              |
| 0.015 | 0.0993                             | 0.0896                                                | 0.0633                                                | 0.0524                                             | 0.0390                                              | 0.0312                                              | 0.0307                                              |

| C/M   | k <sub>obsd</sub> /s <sup>-1</sup><br>70 mM<br>NaCl | k <sub>obsd</sub> /s <sup>-1</sup><br>100 mM<br>NaCl |
|-------|-----------------------------------------------------|------------------------------------------------------|
| 0.003 | 0.0248                                              | 0.0247                                               |
| 0.006 | 0.0250                                              | 0.0248                                               |
| 0.009 | 0.0251                                              | 0.0249                                               |
| 0.012 | 0.0253                                              | 0.0250                                               |
| 0.015 | 0.0254                                              | 0.02502                                              |

**Table S6.** Observed pseudo-first-order rate constants as a function of nucleophile concentration for the reaction of [Pt(SMC)Cl<sub>2</sub>] with guanosine-5'-monophosphate in the presence of various chloride concentrations. I = 0.10 M NaClO<sub>4</sub> at pH = 2.5 and 37 °C.

| C/M   | k <sub>obsd</sub> /s <sup>-1</sup> | k <sub>obsd</sub> /s <sup>-1</sup><br>1.25 mM<br>NaCl | k <sub>obsd</sub> /s <sup>-1</sup><br>2.50 mM<br>NaCl | k <sub>obsd</sub> /s <sup>-1</sup><br>5 mM<br>NaCl | k <sub>obsd</sub> /s <sup>-1</sup><br>10 mM<br>NaCl | k <sub>obsd</sub> /s <sup>-1</sup><br>30 mM<br>NaCl | k <sub>obsd</sub> /s <sup>-1</sup><br>50 mM<br>NaCl |
|-------|------------------------------------|-------------------------------------------------------|-------------------------------------------------------|----------------------------------------------------|-----------------------------------------------------|-----------------------------------------------------|-----------------------------------------------------|
| 0.003 | 0.0082                             | 0.0118                                                | 0.0111                                                | 0.0107                                             | 0.0099                                              | 0.0092                                              | 0.0110                                              |
| 0.006 | 0.0127                             | 0.0135                                                | 0.0124                                                | 0.0113                                             | 0.0101                                              | 0.00996                                             | 0.0113                                              |
| 0.009 | 0.0192                             | 0.0170                                                | 0.0144                                                | 0.0121                                             | 0.0109                                              | 0.0101                                              | 0.0117                                              |
| 0.012 | 0.0246                             | 0.0196                                                | 0.0168                                                | 0.0124                                             | 0.0112                                              | 0.0105                                              | 0.0121                                              |
| 0.015 | 0.0321                             | 0.0229                                                | 0.0182                                                | 0.0132                                             | 0.0119                                              | 0.0109                                              | 0.0124                                              |

**Table S7.** Observed pseudo-first-order rate constants as a function of nucleophile concentration for the reaction of [Pt(SMC)Cl<sub>2</sub>] with guanosine-5'-monophosphate in the presence of various chloride concentrations. I = 0.25 M Hepes buffer at pH = 7.2 and 37 °C.

| C/M   | $k_{\text{obsd}}/\text{s}^{-1}$ | $k_{\text{obsd}}/\text{s}^{-1}$<br>1.25 mM<br>NaCl | $k_{\text{obsd}}/\text{s}^{-1}$<br>2.50 mM<br>NaCl | $k_{\text{obsd}}/\text{s}^{-1}$<br>5 mM<br>NaCl | $k_{\text{obsd}}/\text{s}^{-1}$<br>10 mM<br>NaCl | $k_{\text{obsd}}/\text{s}^{-1}$<br>30 mM<br>NaCl | $k_{\text{obsd}}/\text{s}^{-1}$<br>50 mM<br>NaCl |
|-------|---------------------------------|----------------------------------------------------|----------------------------------------------------|-------------------------------------------------|--------------------------------------------------|--------------------------------------------------|--------------------------------------------------|
| 0.003 | 0.0032                          | 0.0034                                             | 0.0032                                             | 0.0025                                          | 0.0026                                           | 0.0024                                           | 0.0025                                           |
| 0.006 | 0.0057                          | 0.0053                                             | 0.0047                                             | 0.0033                                          | 0.0033                                           | 0.0028                                           | 0.00268                                          |
| 0.009 | 0.0097                          | 0.0078                                             | 0.0060                                             | 0.0037                                          | 0.0035                                           | 0.0029                                           | 0.00272                                          |
| 0.012 | 0.0118                          | 0.0096                                             | 0.0073                                             | 0.0043                                          | 0.0038                                           | 0.0032                                           | 0.0029                                           |
| 0.015 | 0.0150                          | 0.0111                                             | 0.0095                                             | 0.0051                                          | 0.00398                                          | 0.0033                                           | 0.0029                                           |

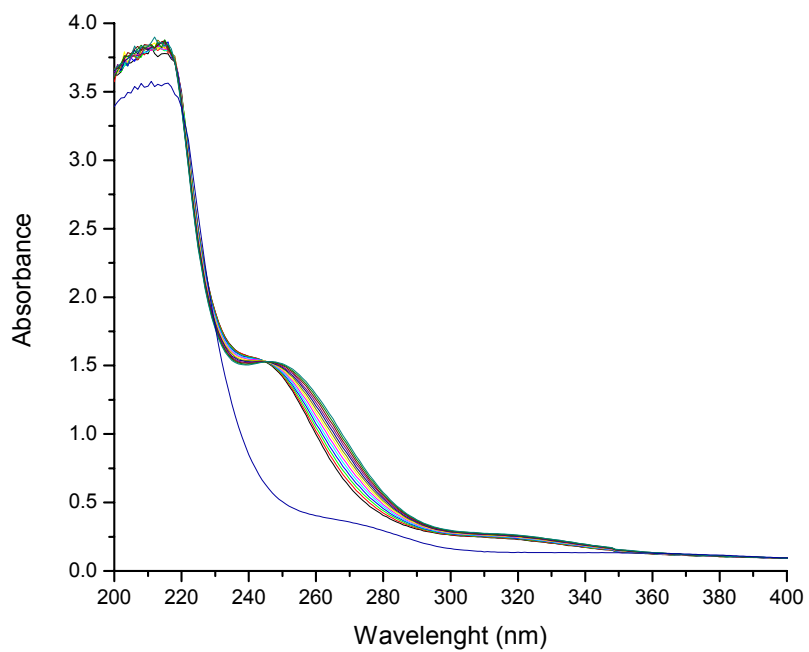

**Figure S1.** Rapid-scan spectra recorded for the reaction of  $[\text{Pt}(\text{SMC})\text{Cl}_2]$  with L-methionine at time intervals of 1 s after mixing at  $\text{pH} = 2.5$ .  $I = 0.10 \text{ M NaClO}_4$ .

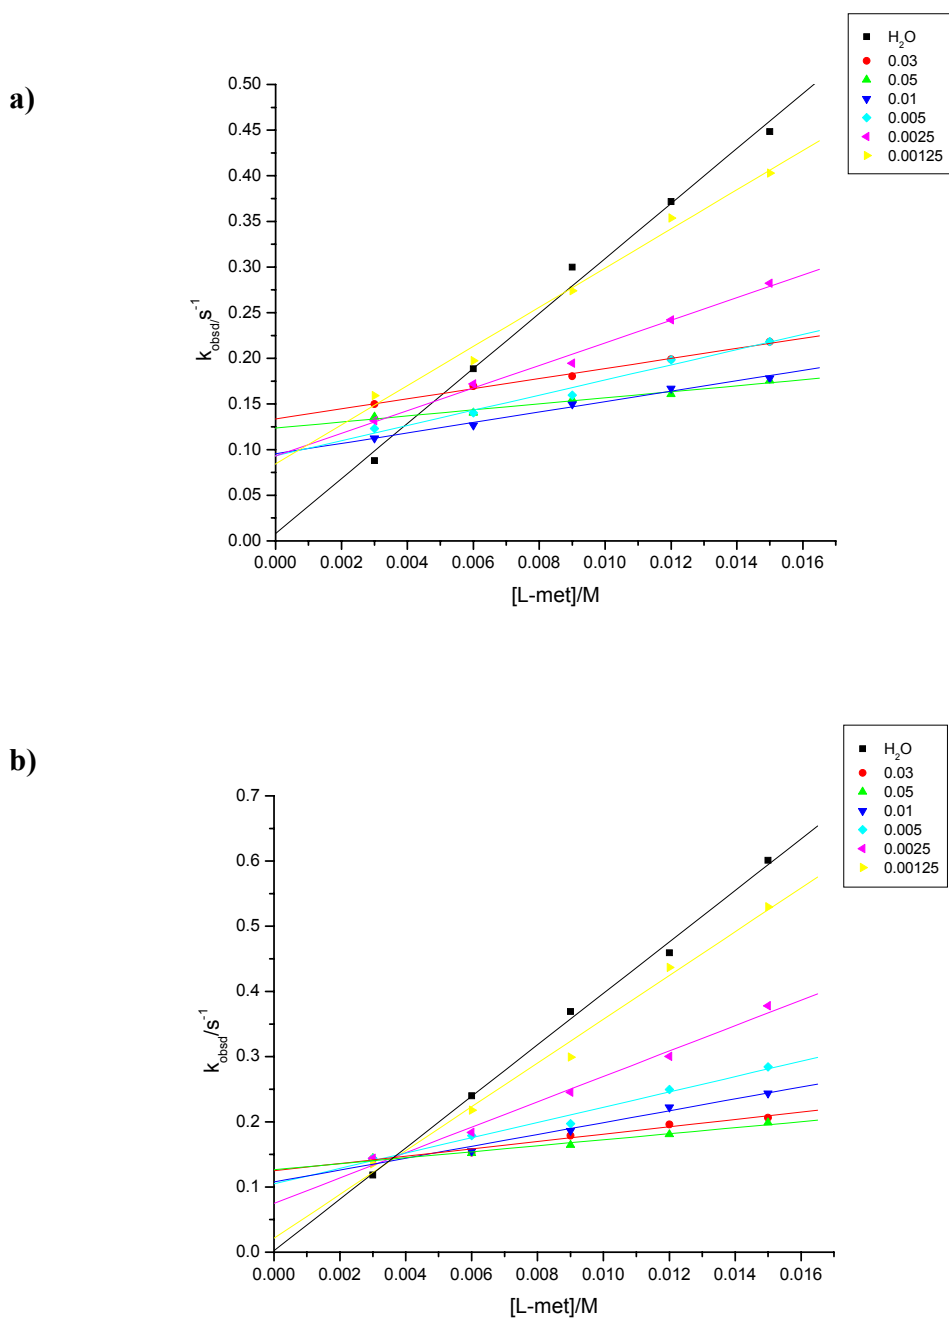

**Figure S2.** Pseudo-first order rate constants as a function of nucleophile concentration for the substitution reaction of  $[\text{Pt}(\text{SMC})\text{Cl}_2]$  by L-methionine in the presence of various chloride concentrations at pH = 2.5, 0.1 M  $\text{NaClO}_4$  (a) and pH = 7.2, 0.25 M Hepes buffer (b) and 37 °C.

a)

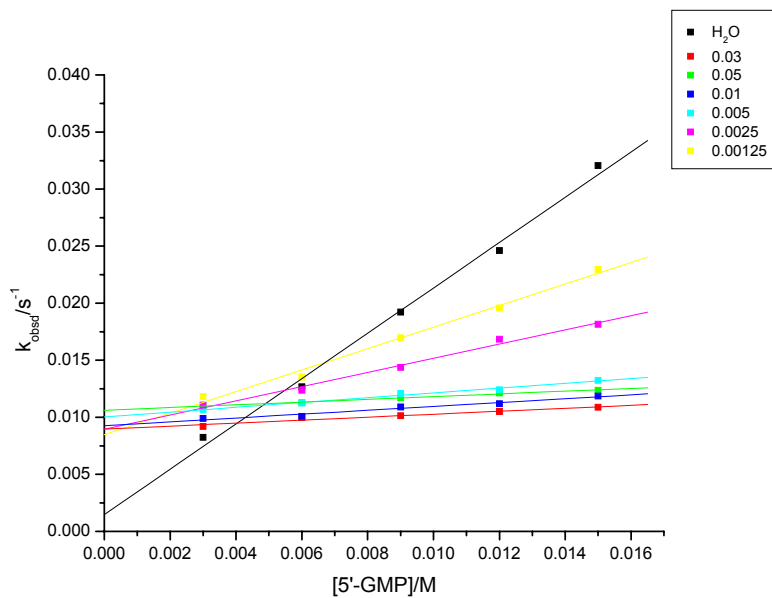

b)

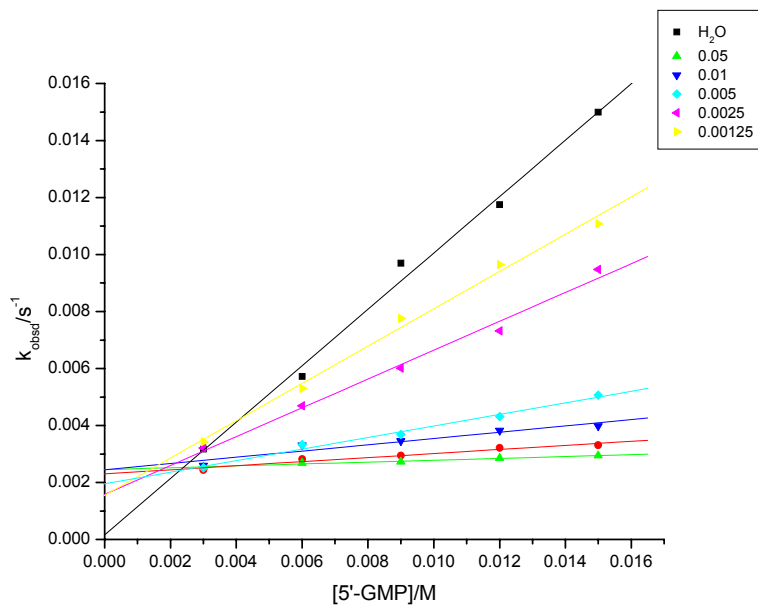

**Figure S3.** Pseudo-first order rate constants as a function of nucleophile concentration for the substitution reaction of  $[\text{Pt}(\text{SMC})\text{Cl}_2]$  by guanosine-5'-monophosphate in the



presence of various chloride concentrations at pH = 2.5, 0.1 M NaClO<sub>4</sub> (a) and pH = 7.2, 0.25 M Hepes buffer (b) and 37 °C.

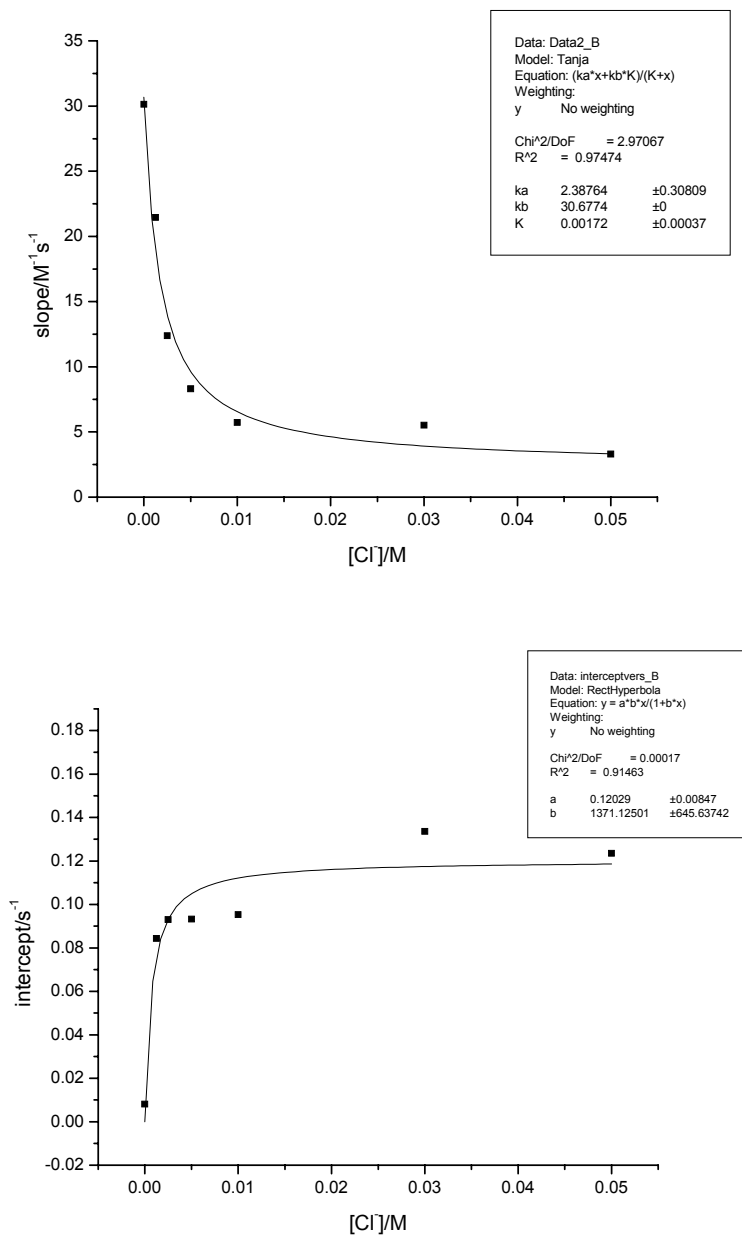

**Figure S4.** Dependence of slope and intercept on the chloride concentration for substitution of [Pt(SMC)Cl<sub>2</sub>] by L-methionine at pH = 2.5, I = 0.1 M NaClO<sub>4</sub> and 37 °C.

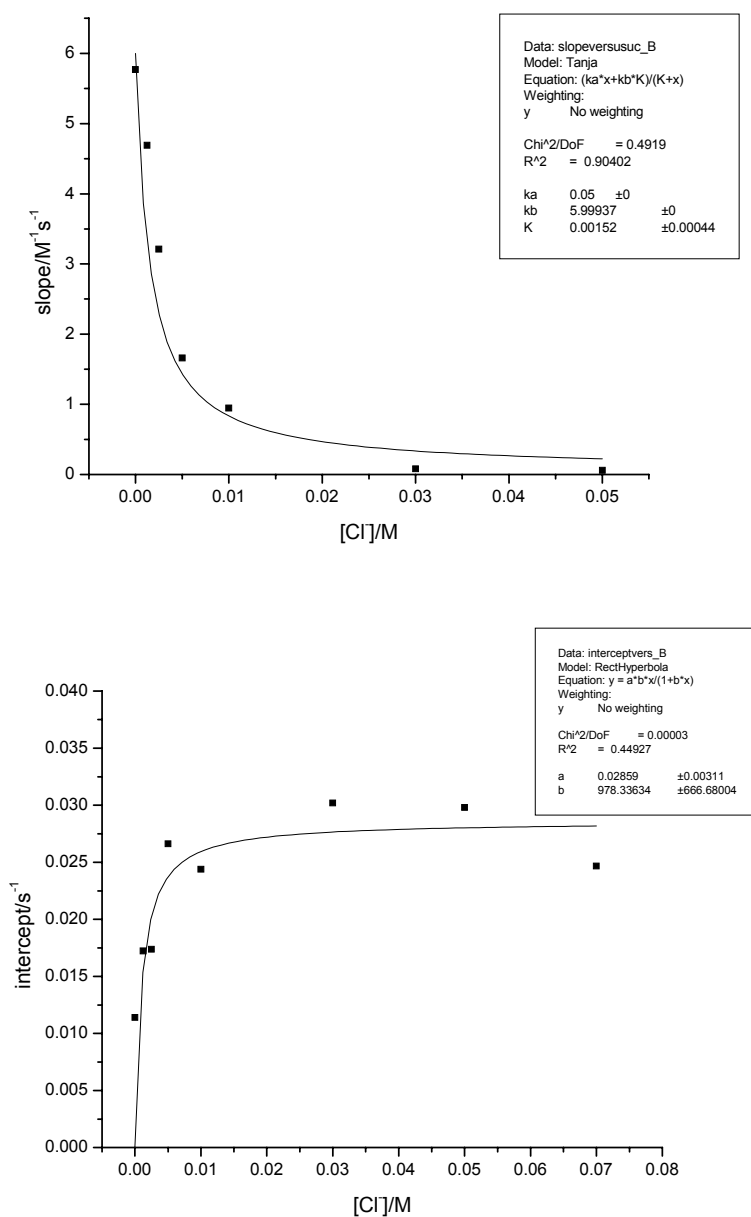

**Figure S5.** Dependence of slope and intercept on the chloride concentration for substitution of [Pt(SMC)Cl<sub>2</sub>] by inosine at pH = 2.5, I = 0.1 M NaClO<sub>4</sub> and 37 °C.

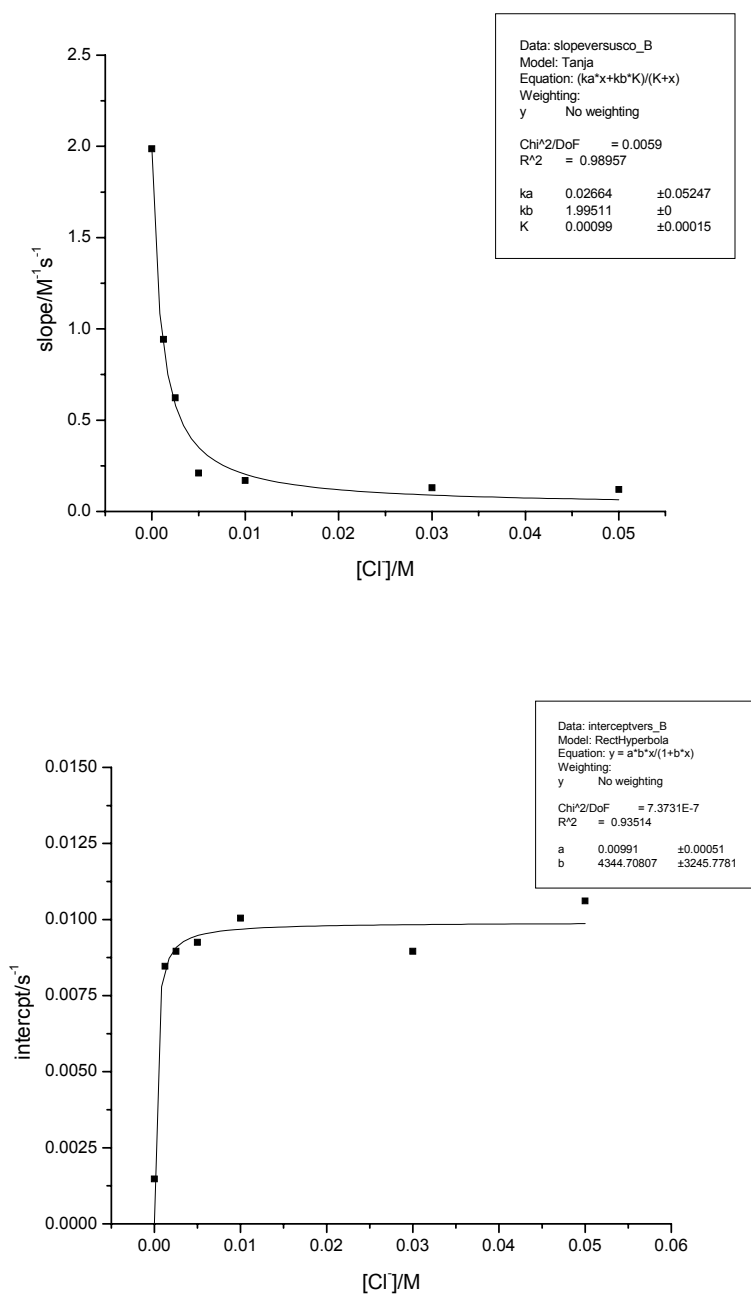

**Figure S6.** Dependence of slope and intercept on the chloride concentration for substitution of [Pt(SMC)Cl<sub>2</sub>] by guanosine-5'-monophosphate at pH = 2.5, I = 0.1 M NaClO<sub>4</sub> and 37 °C.

Electronic Supplementary Information for Dalton Transactions  
This journal is © The Royal Society of Chemistry 2009

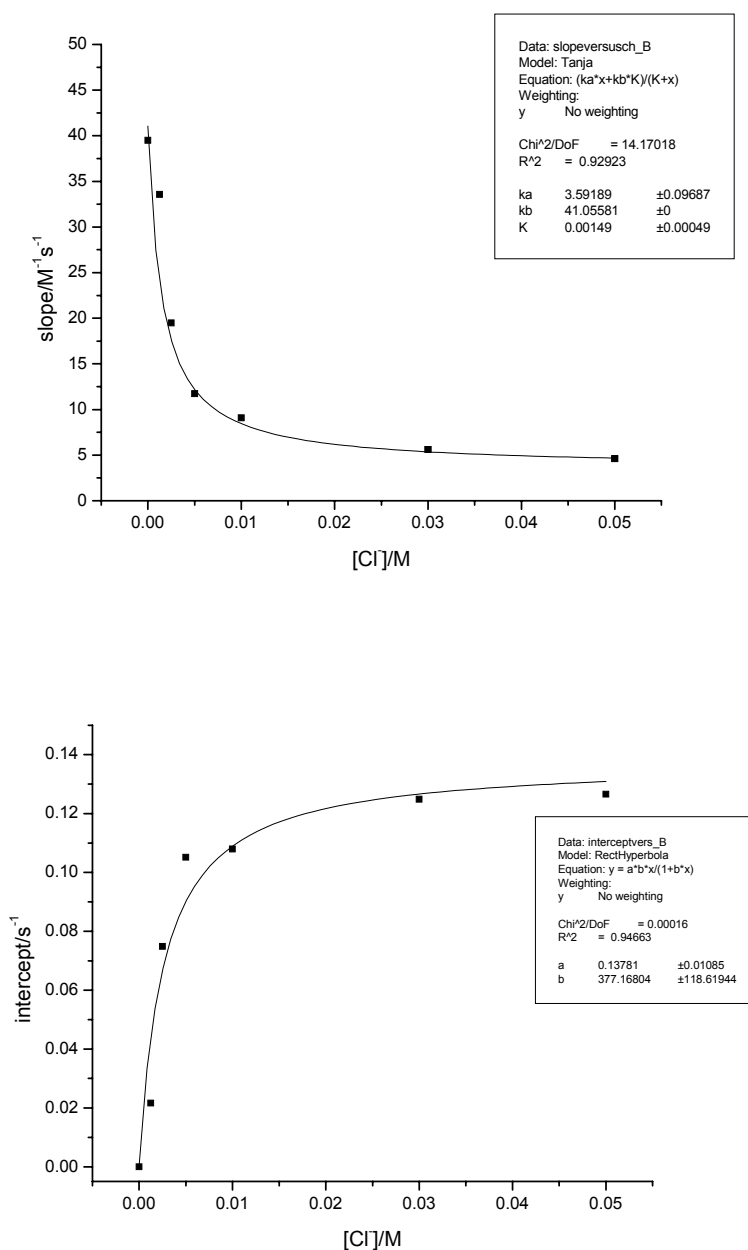

**Figure S7.** Dependence of slope and intercept on the chloride concentration for substitution of  $[\text{Pt}(\text{SMC})\text{Cl}_2]$  by L-methionine at  $\text{pH} = 7.2$ , 0.25 M HEPES buffer and  $37^\circ\text{C}$ .

Electronic Supplementary Information for Dalton Transactions  
This journal is © The Royal Society of Chemistry 2009

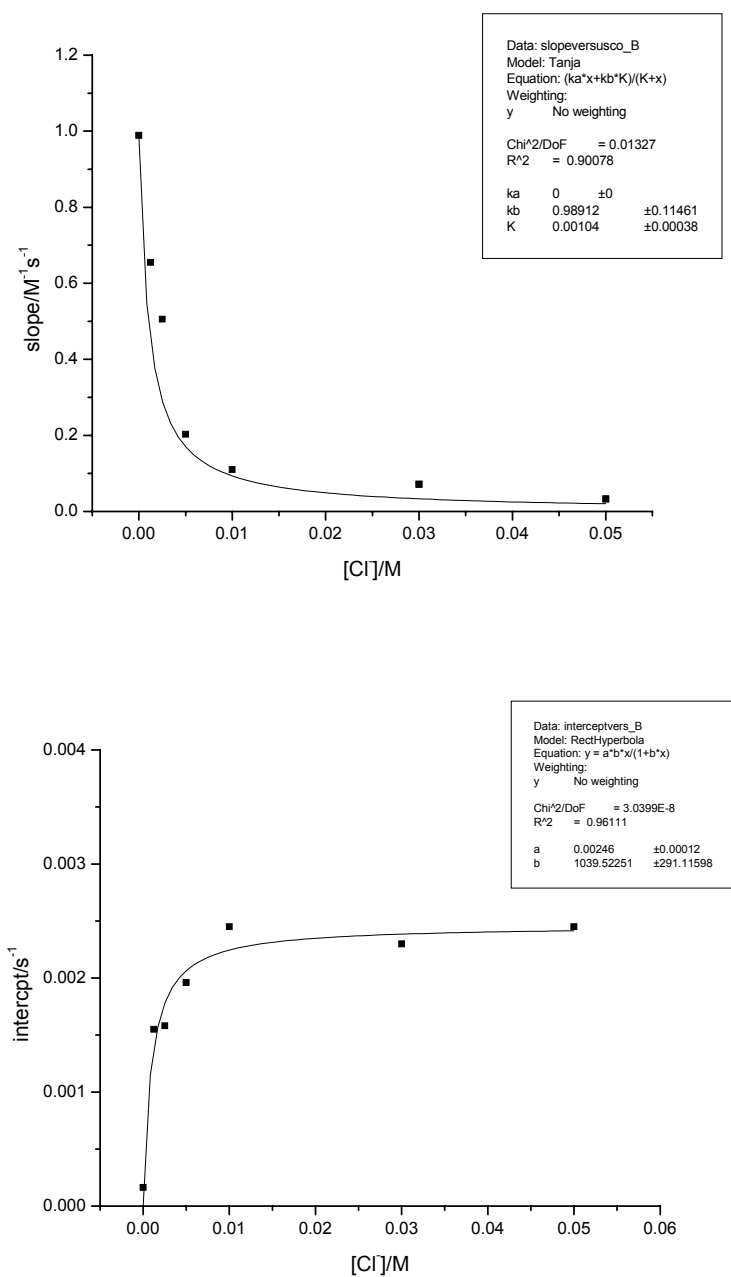

**Figure S8.** Dependence of slope and intercept on the chloride concentration for substitution of  $[\text{Pt}(\text{SMC})\text{Cl}_2]$  by guanosine-5'-monophosphate at  $\text{pH} = 7.2$ , 0.25 M HEPES buffer and 37 °C.
